# Supplementary material for: Identification of DNA methylation biomarkers with potential to predict response to neoadjuvant chemotherapy in triple-negative breast cancer
Source: PubMed Central journal article supplement (PMC8684655; doi:10.1186/s13148-021-01210-6), 2021-12-18
Supplement: 13148_2021_1210_MOESM2_ESM.pdf [file 13148_2021_1210_MOESM2_ESM.pdf]

Supplementary Figure 1

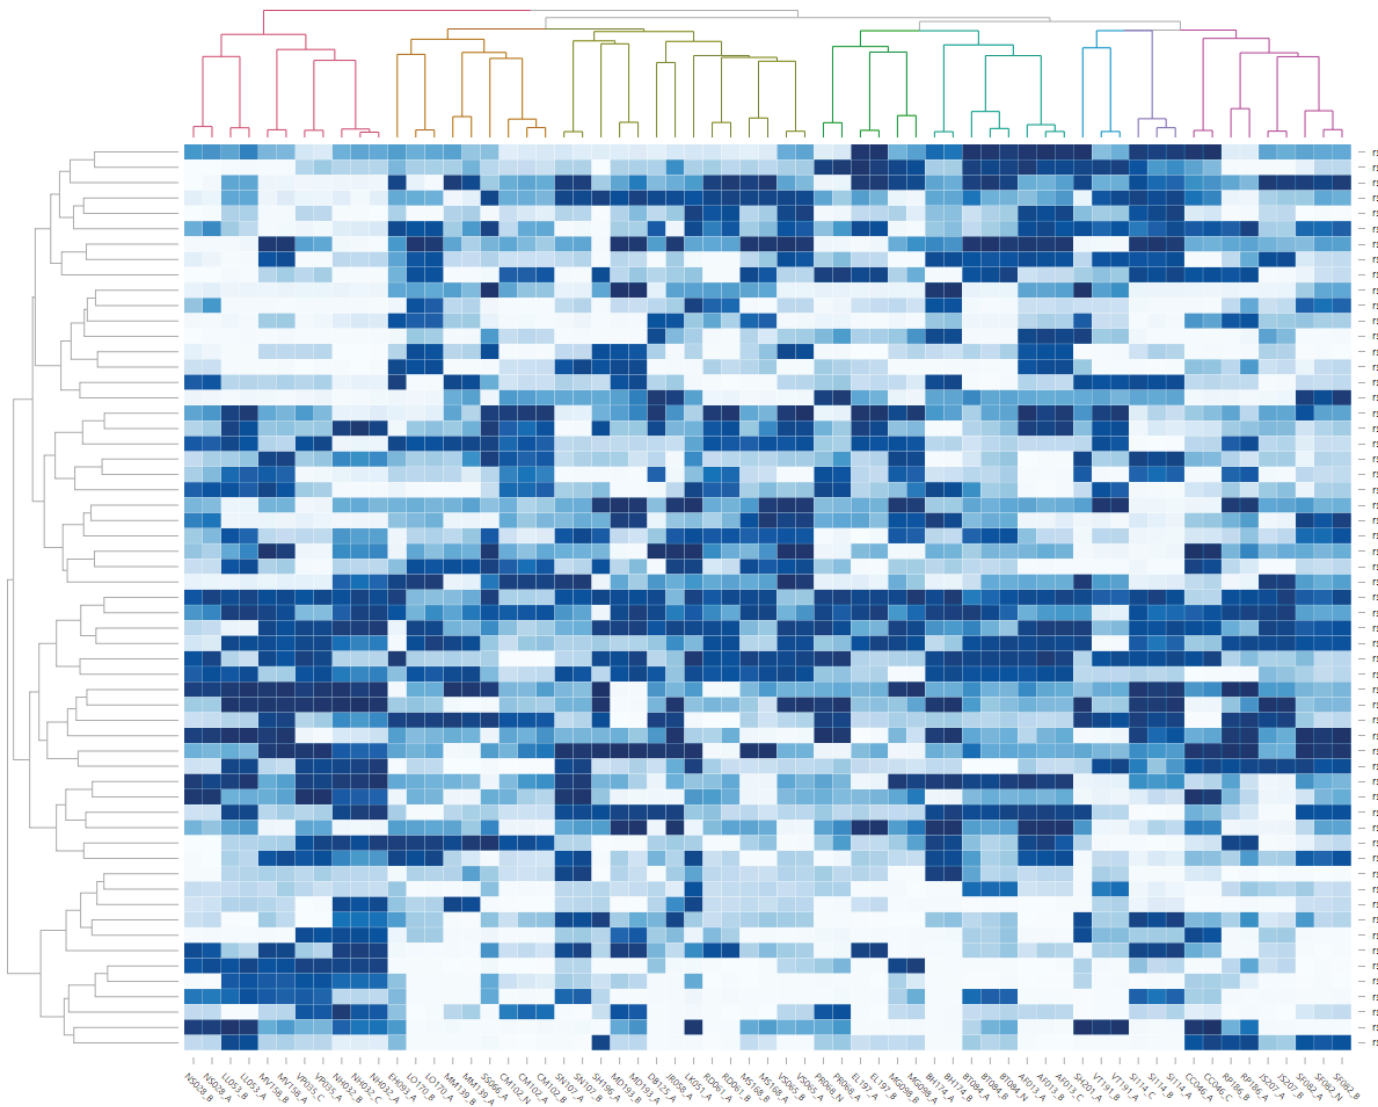

Supplementary Figure 2a

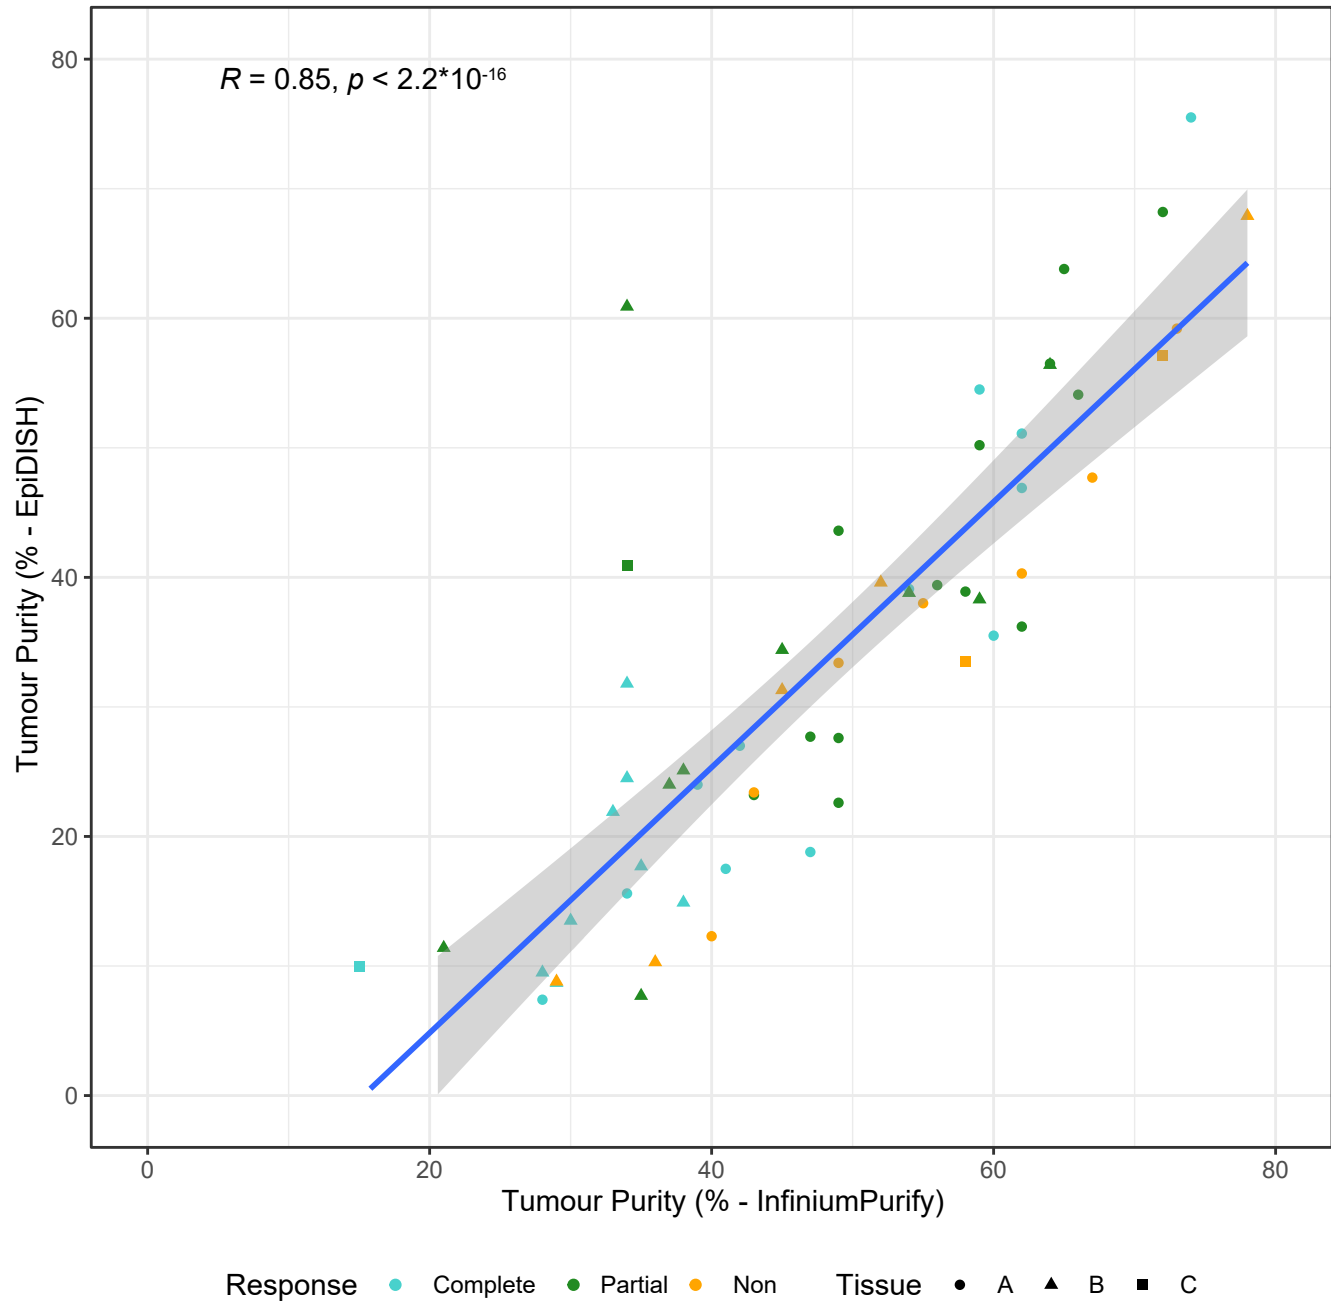

Supplementary Figure 2b

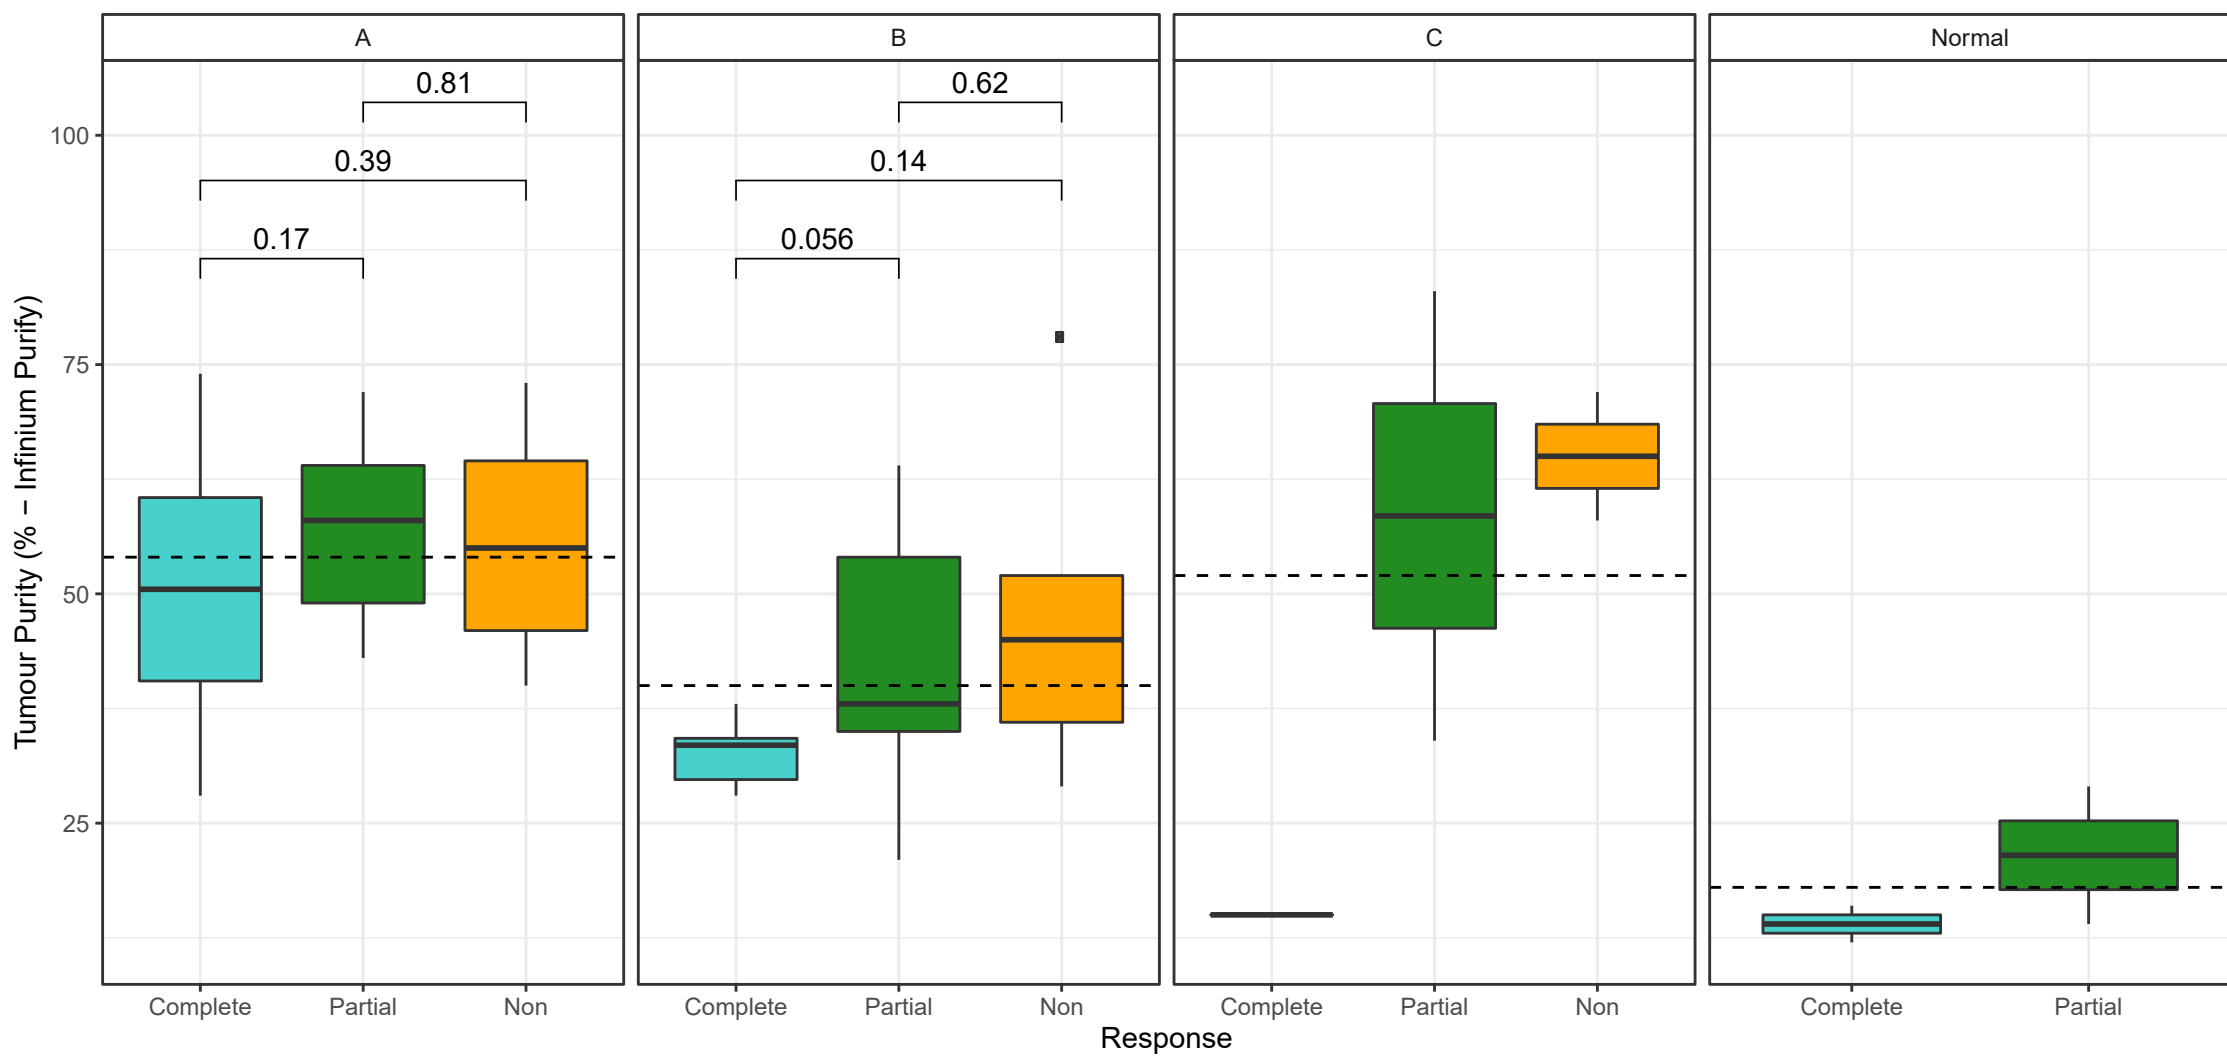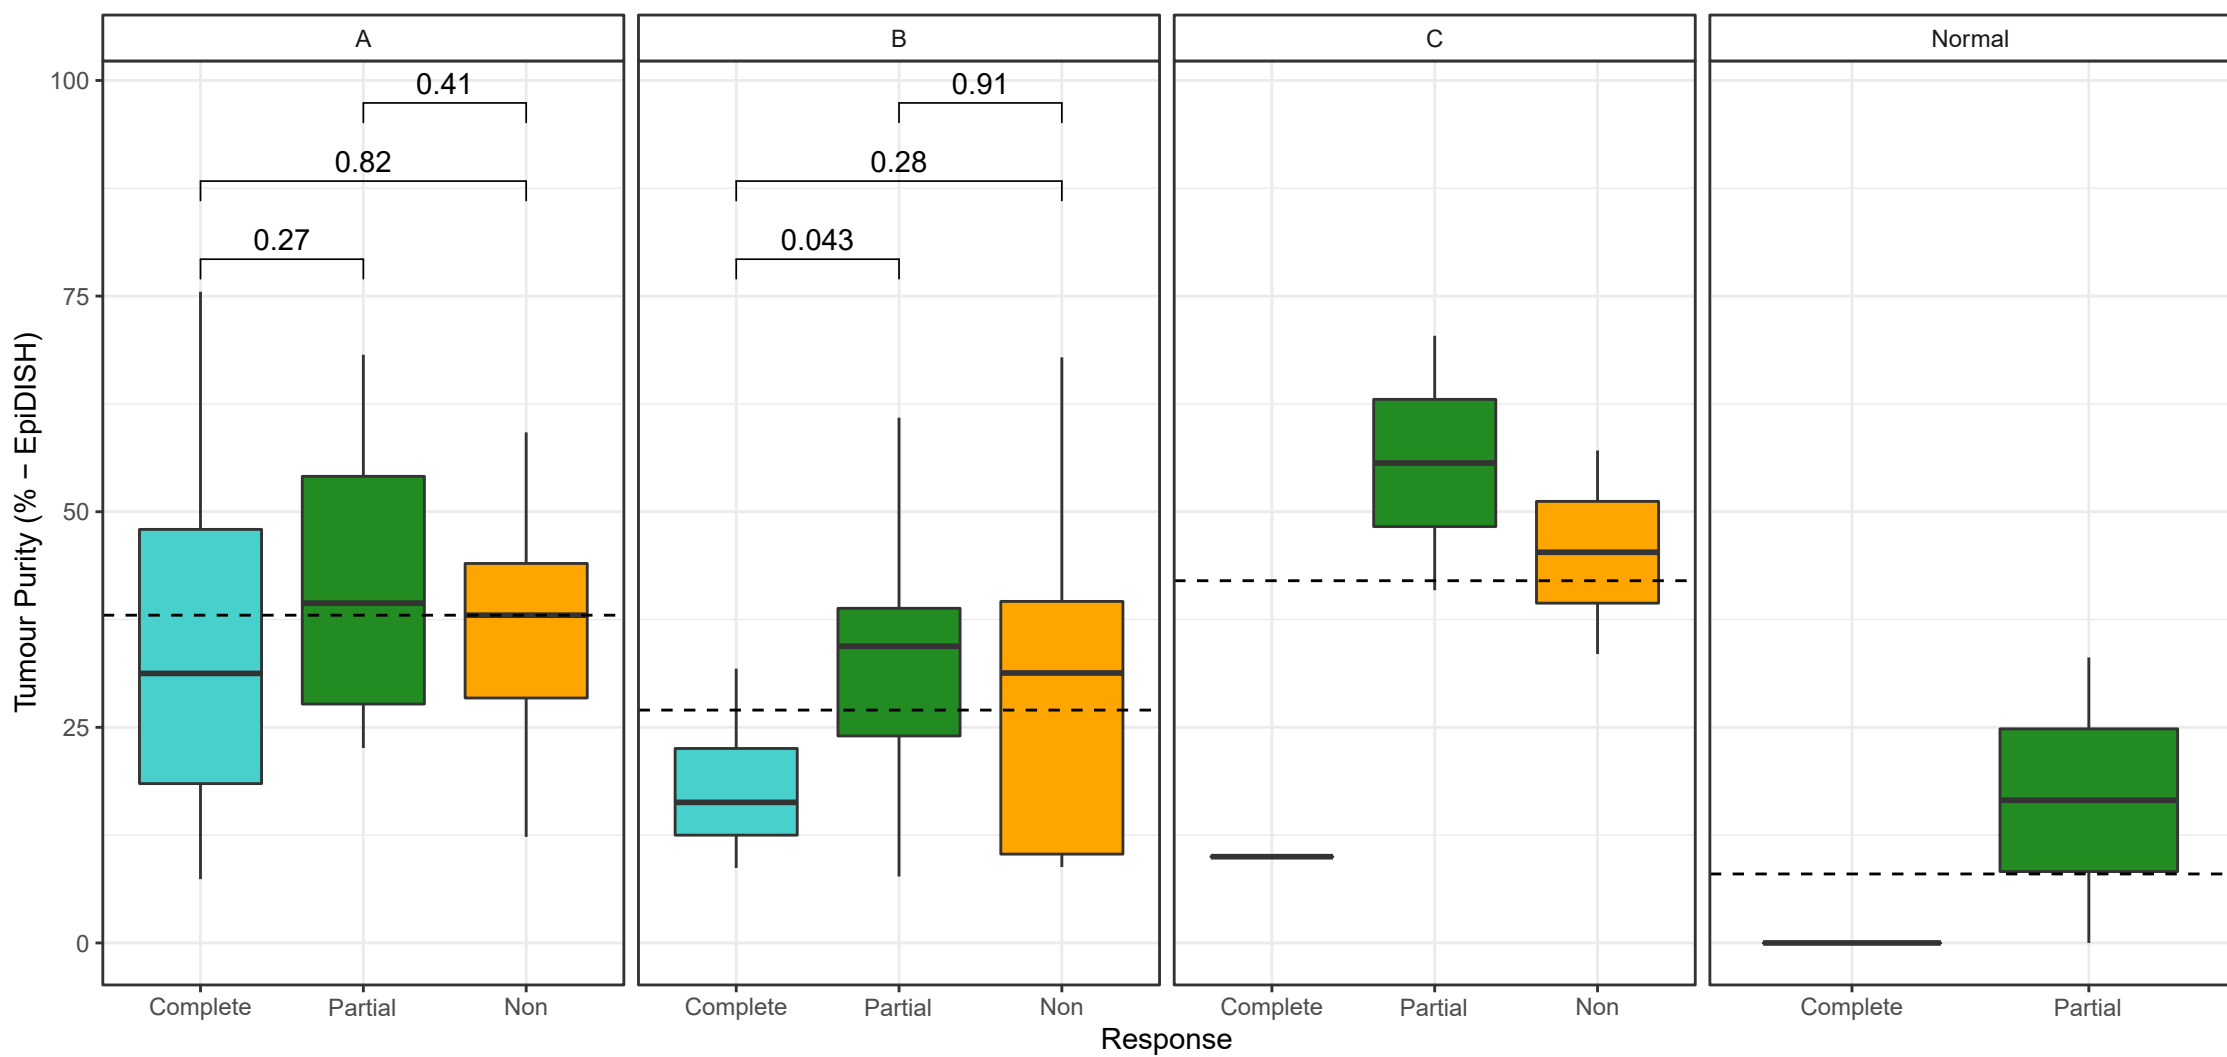

Supplementary Figure 3

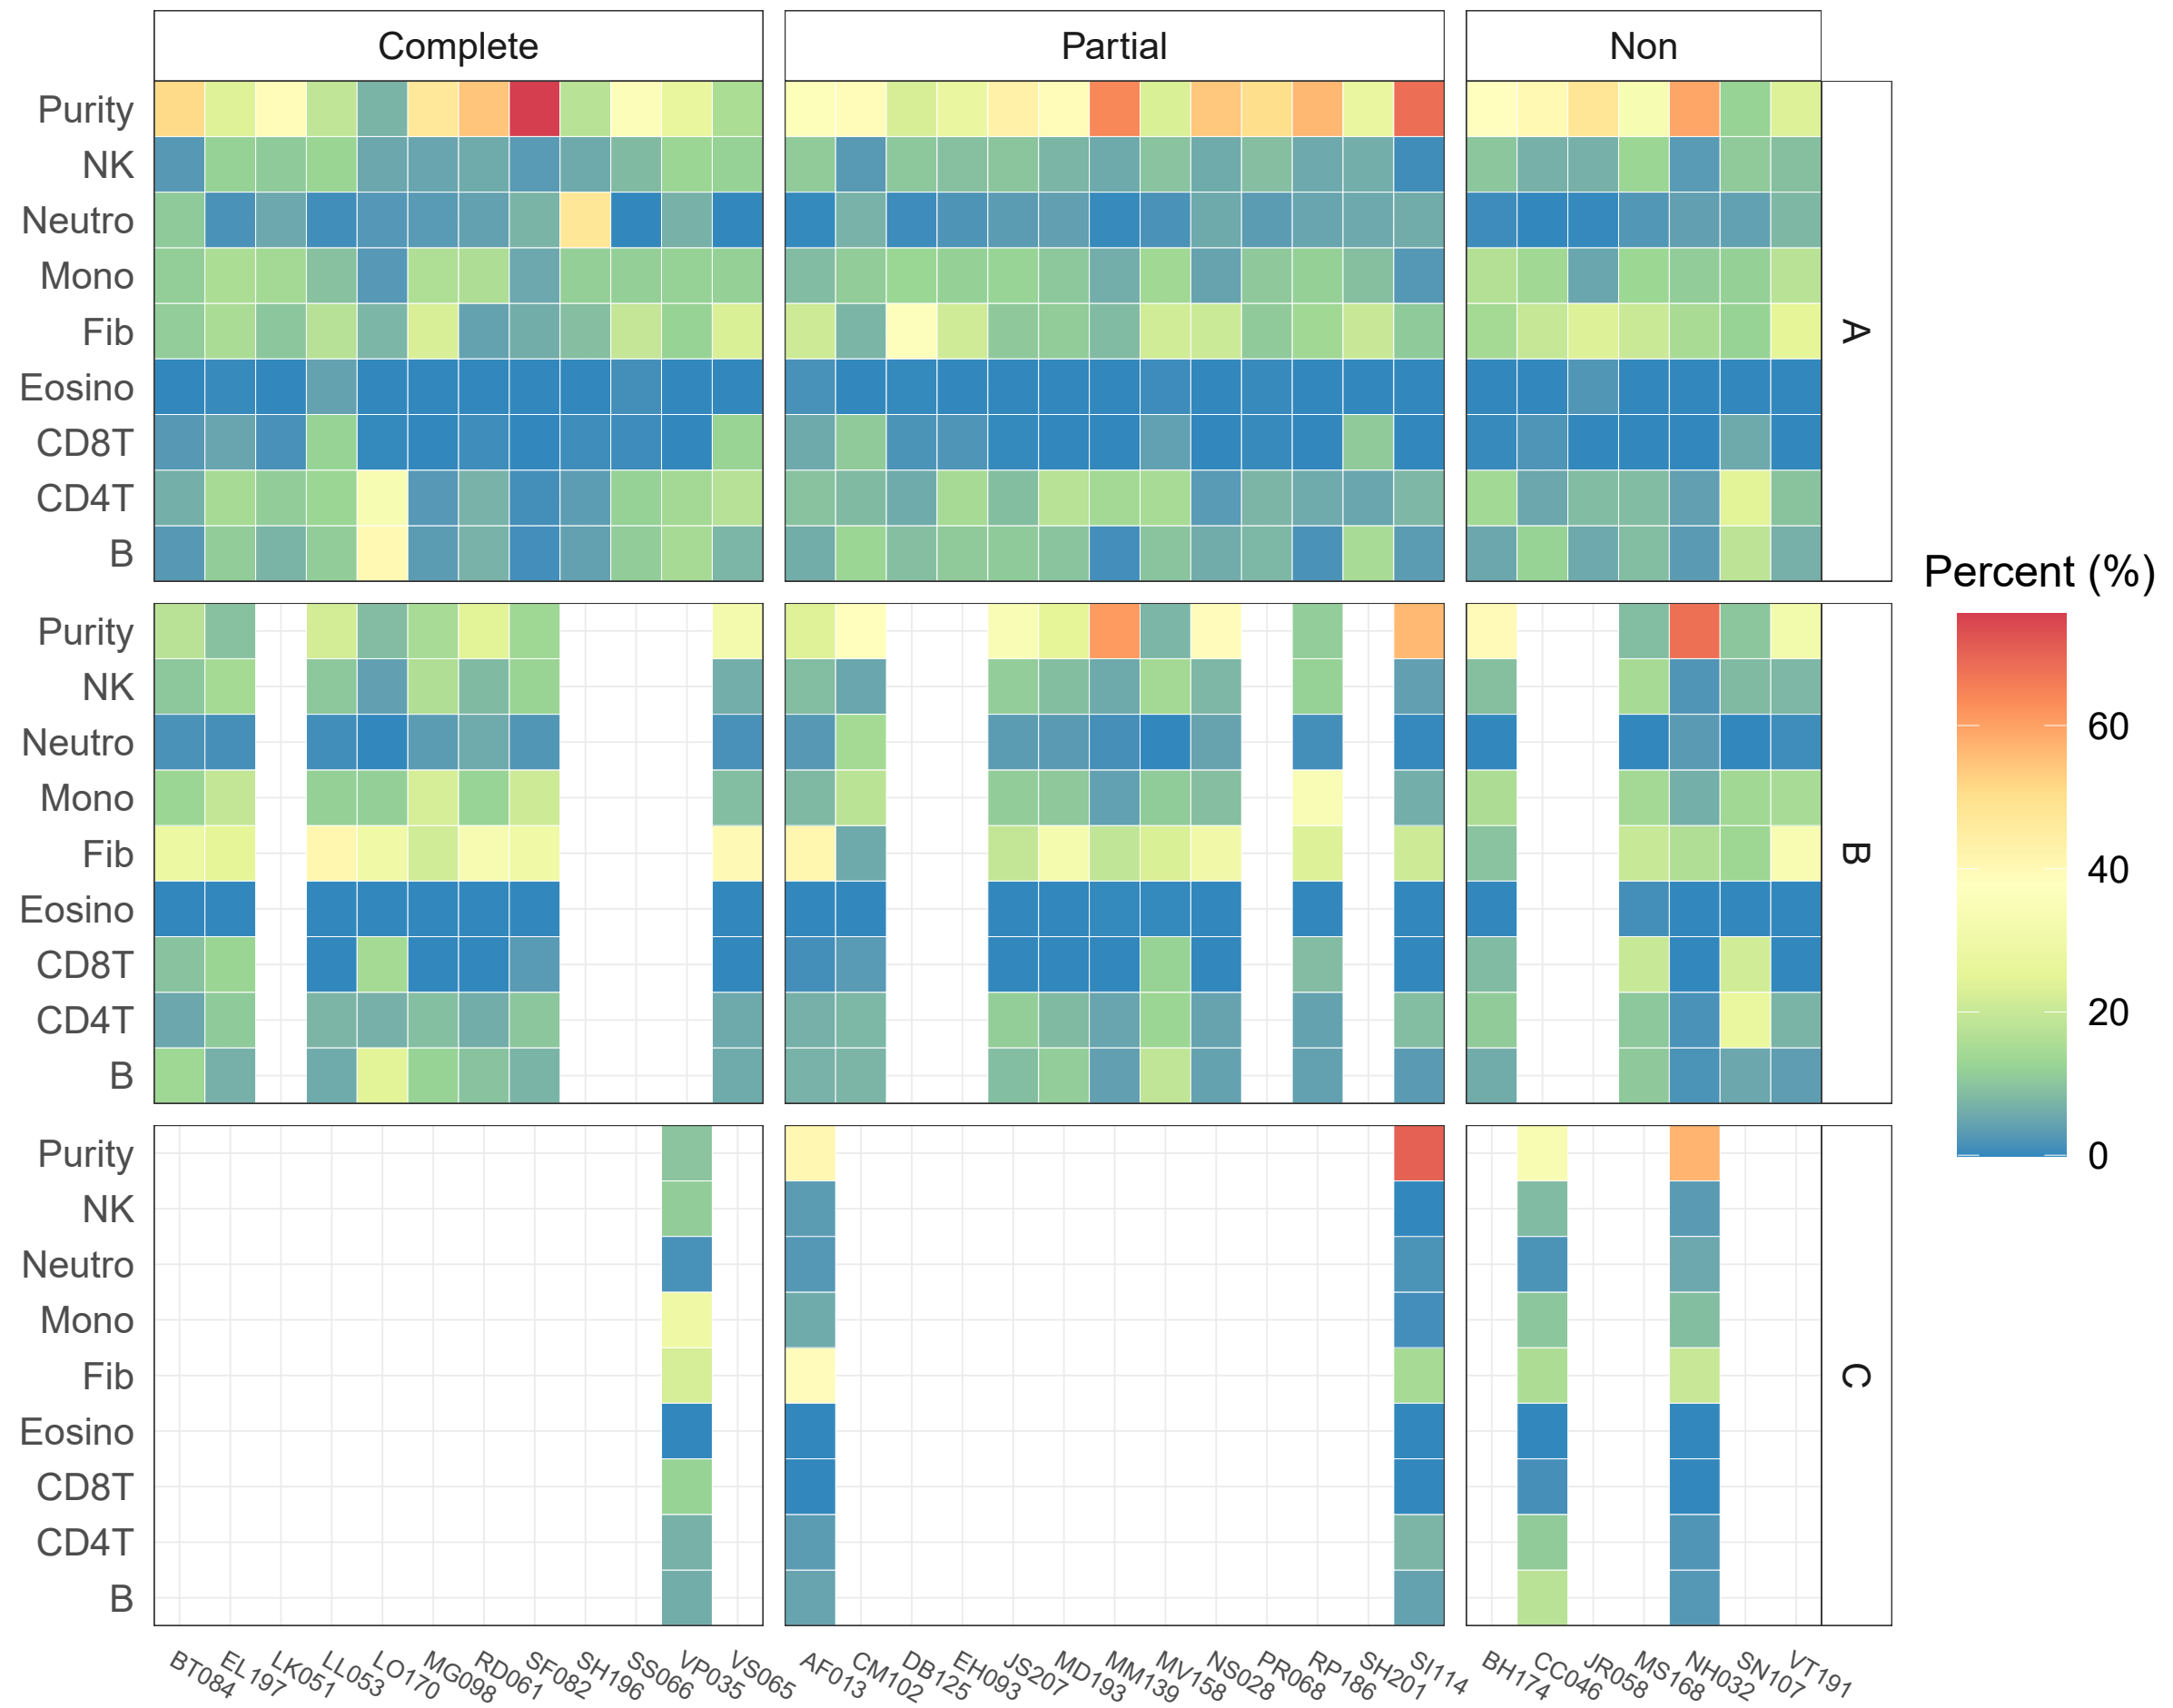

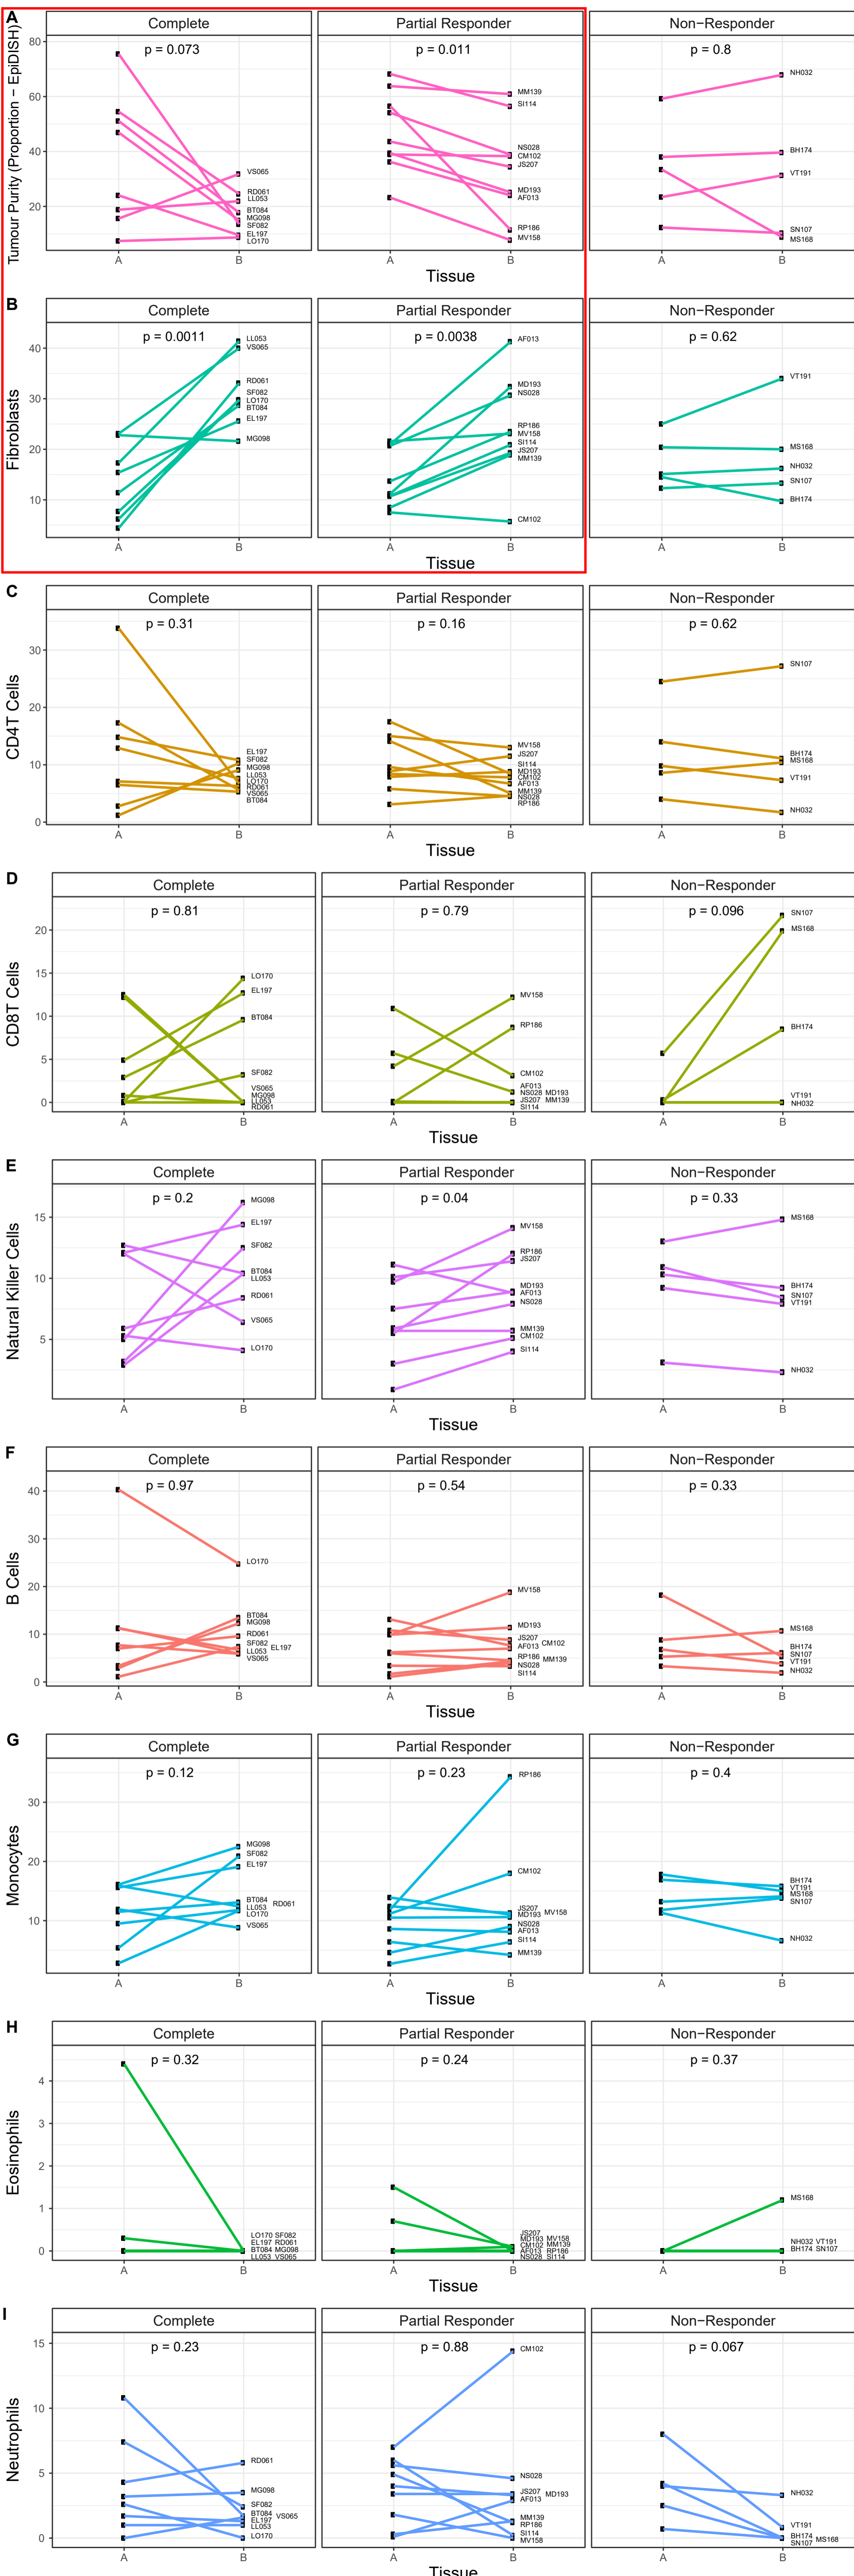

a) **Initial Principal Components Analysis**

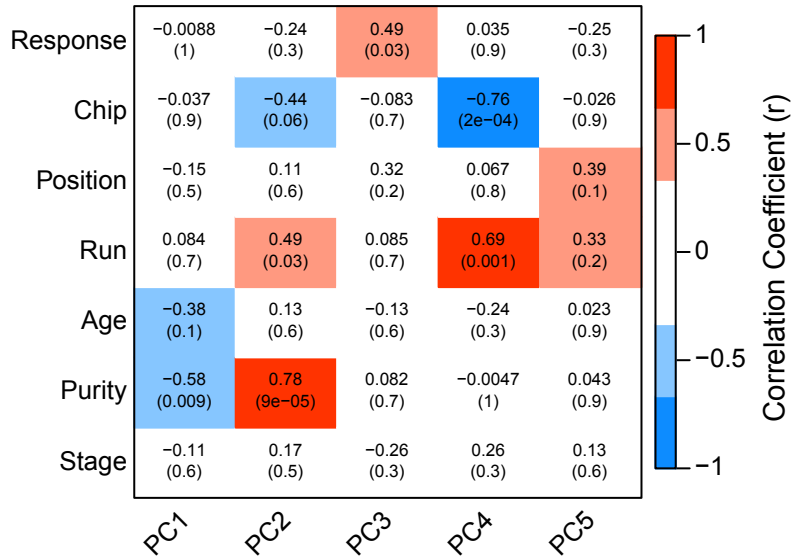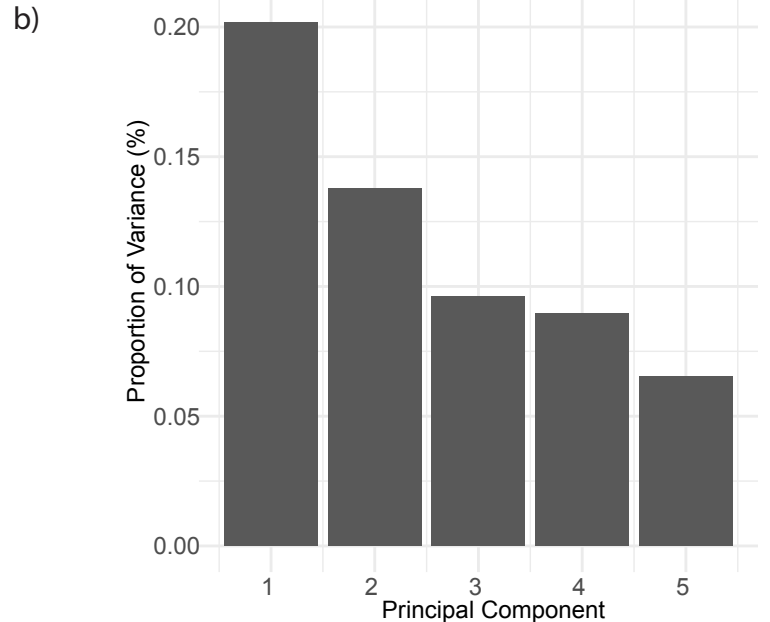

c) **Principal Components Analysis after removeBatchEffect correction**

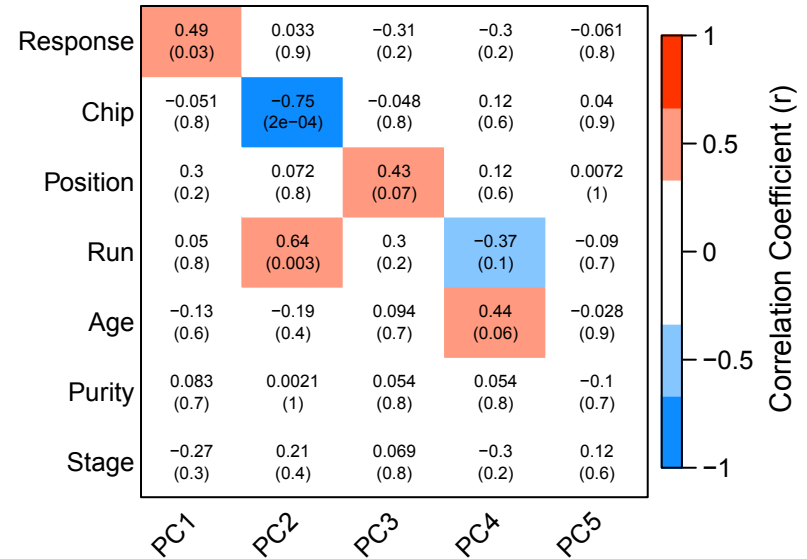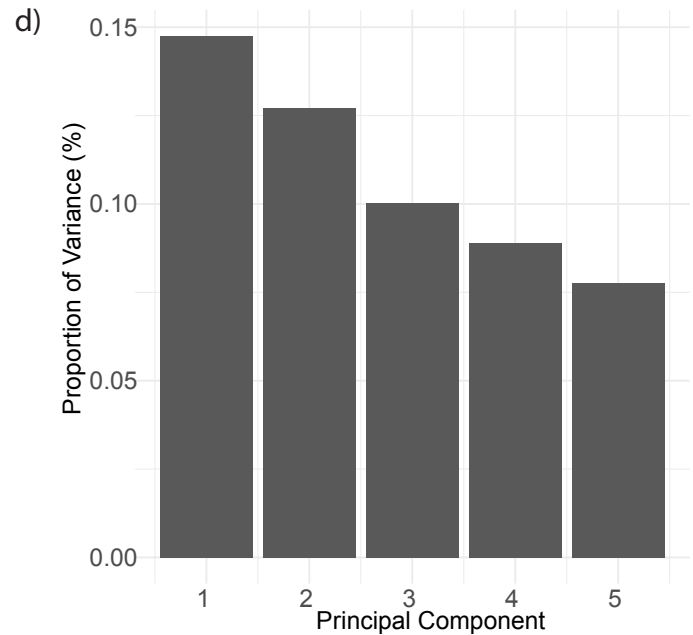

*Alu*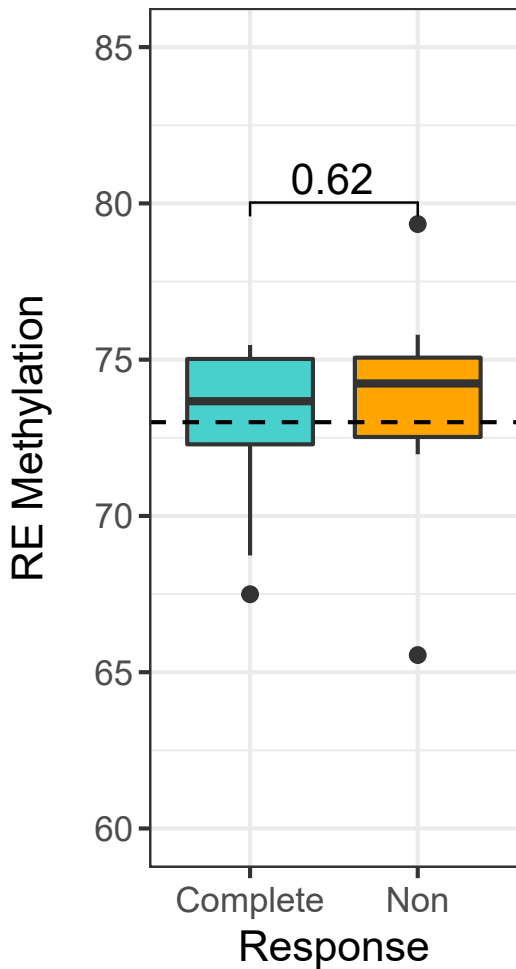*LINE1*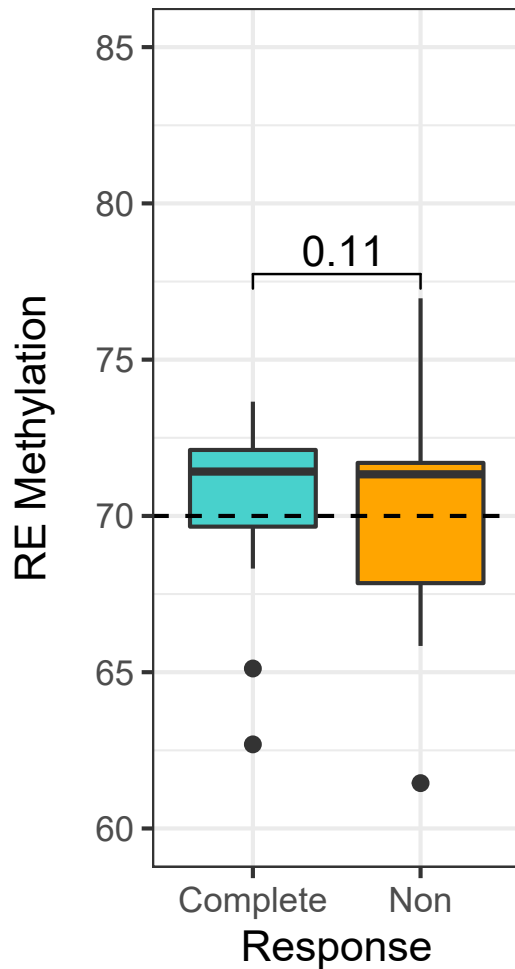*LTR*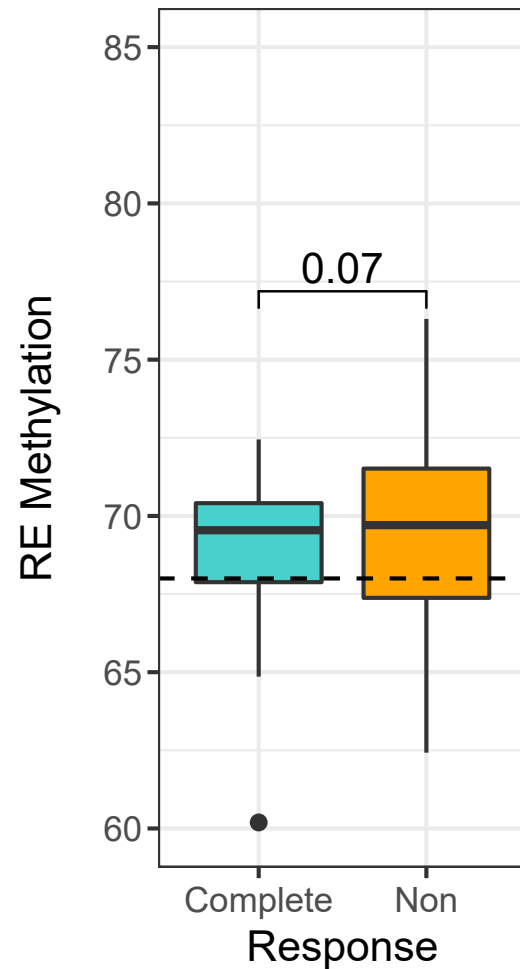

Supplementary Figure 7a

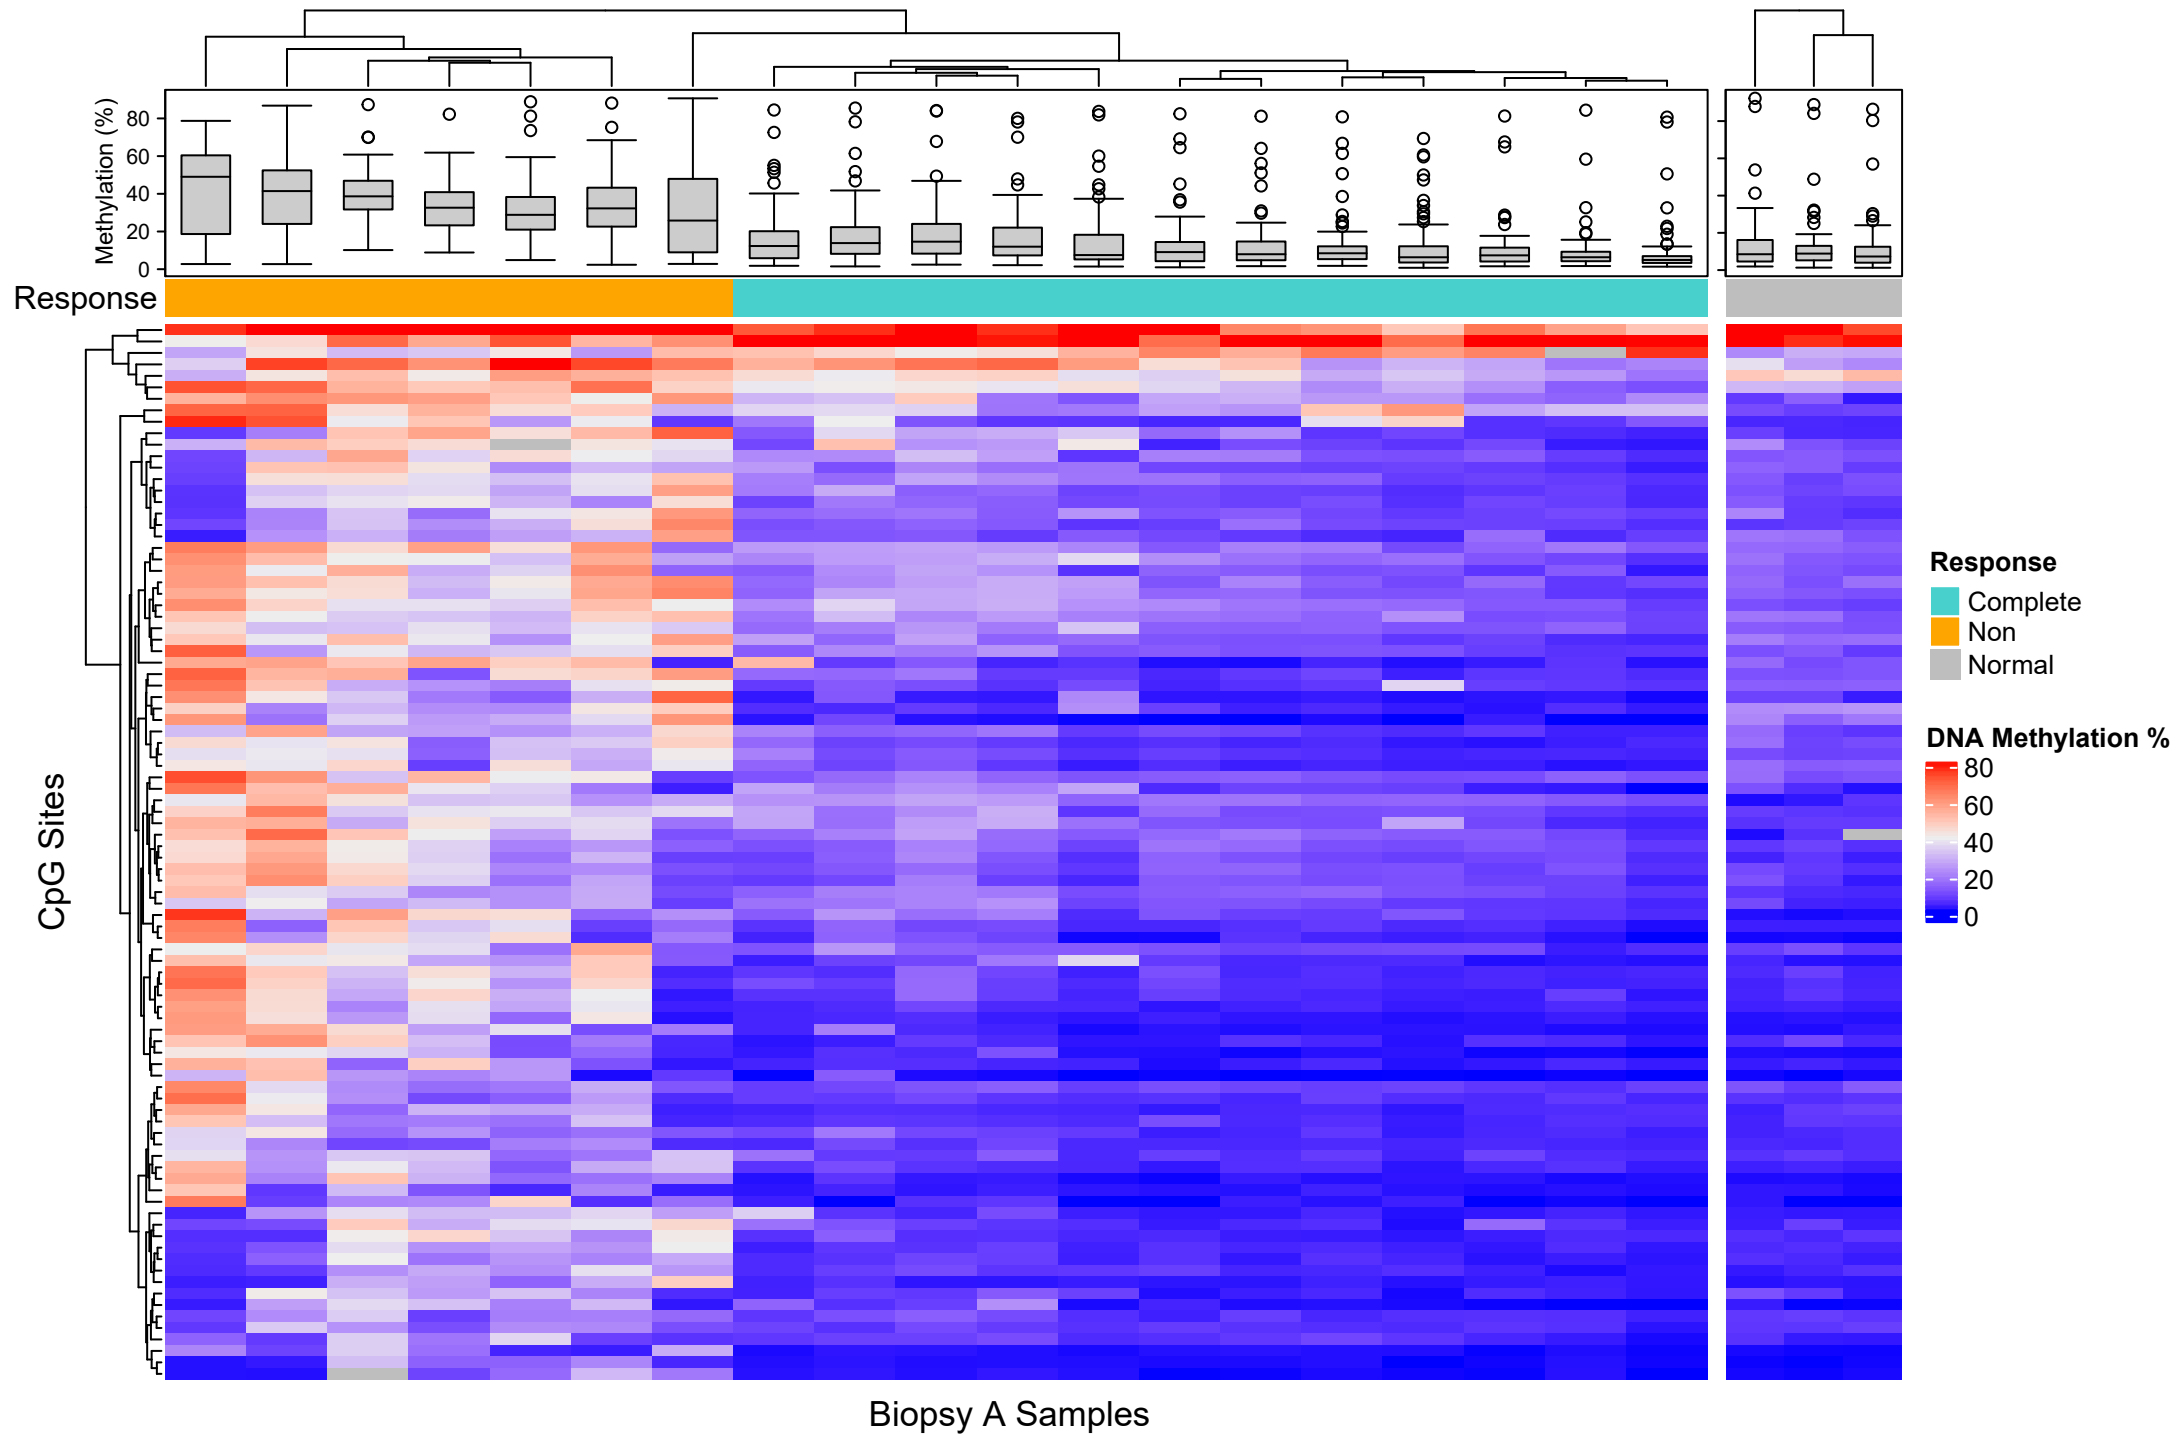



Supplementary Figure 7b

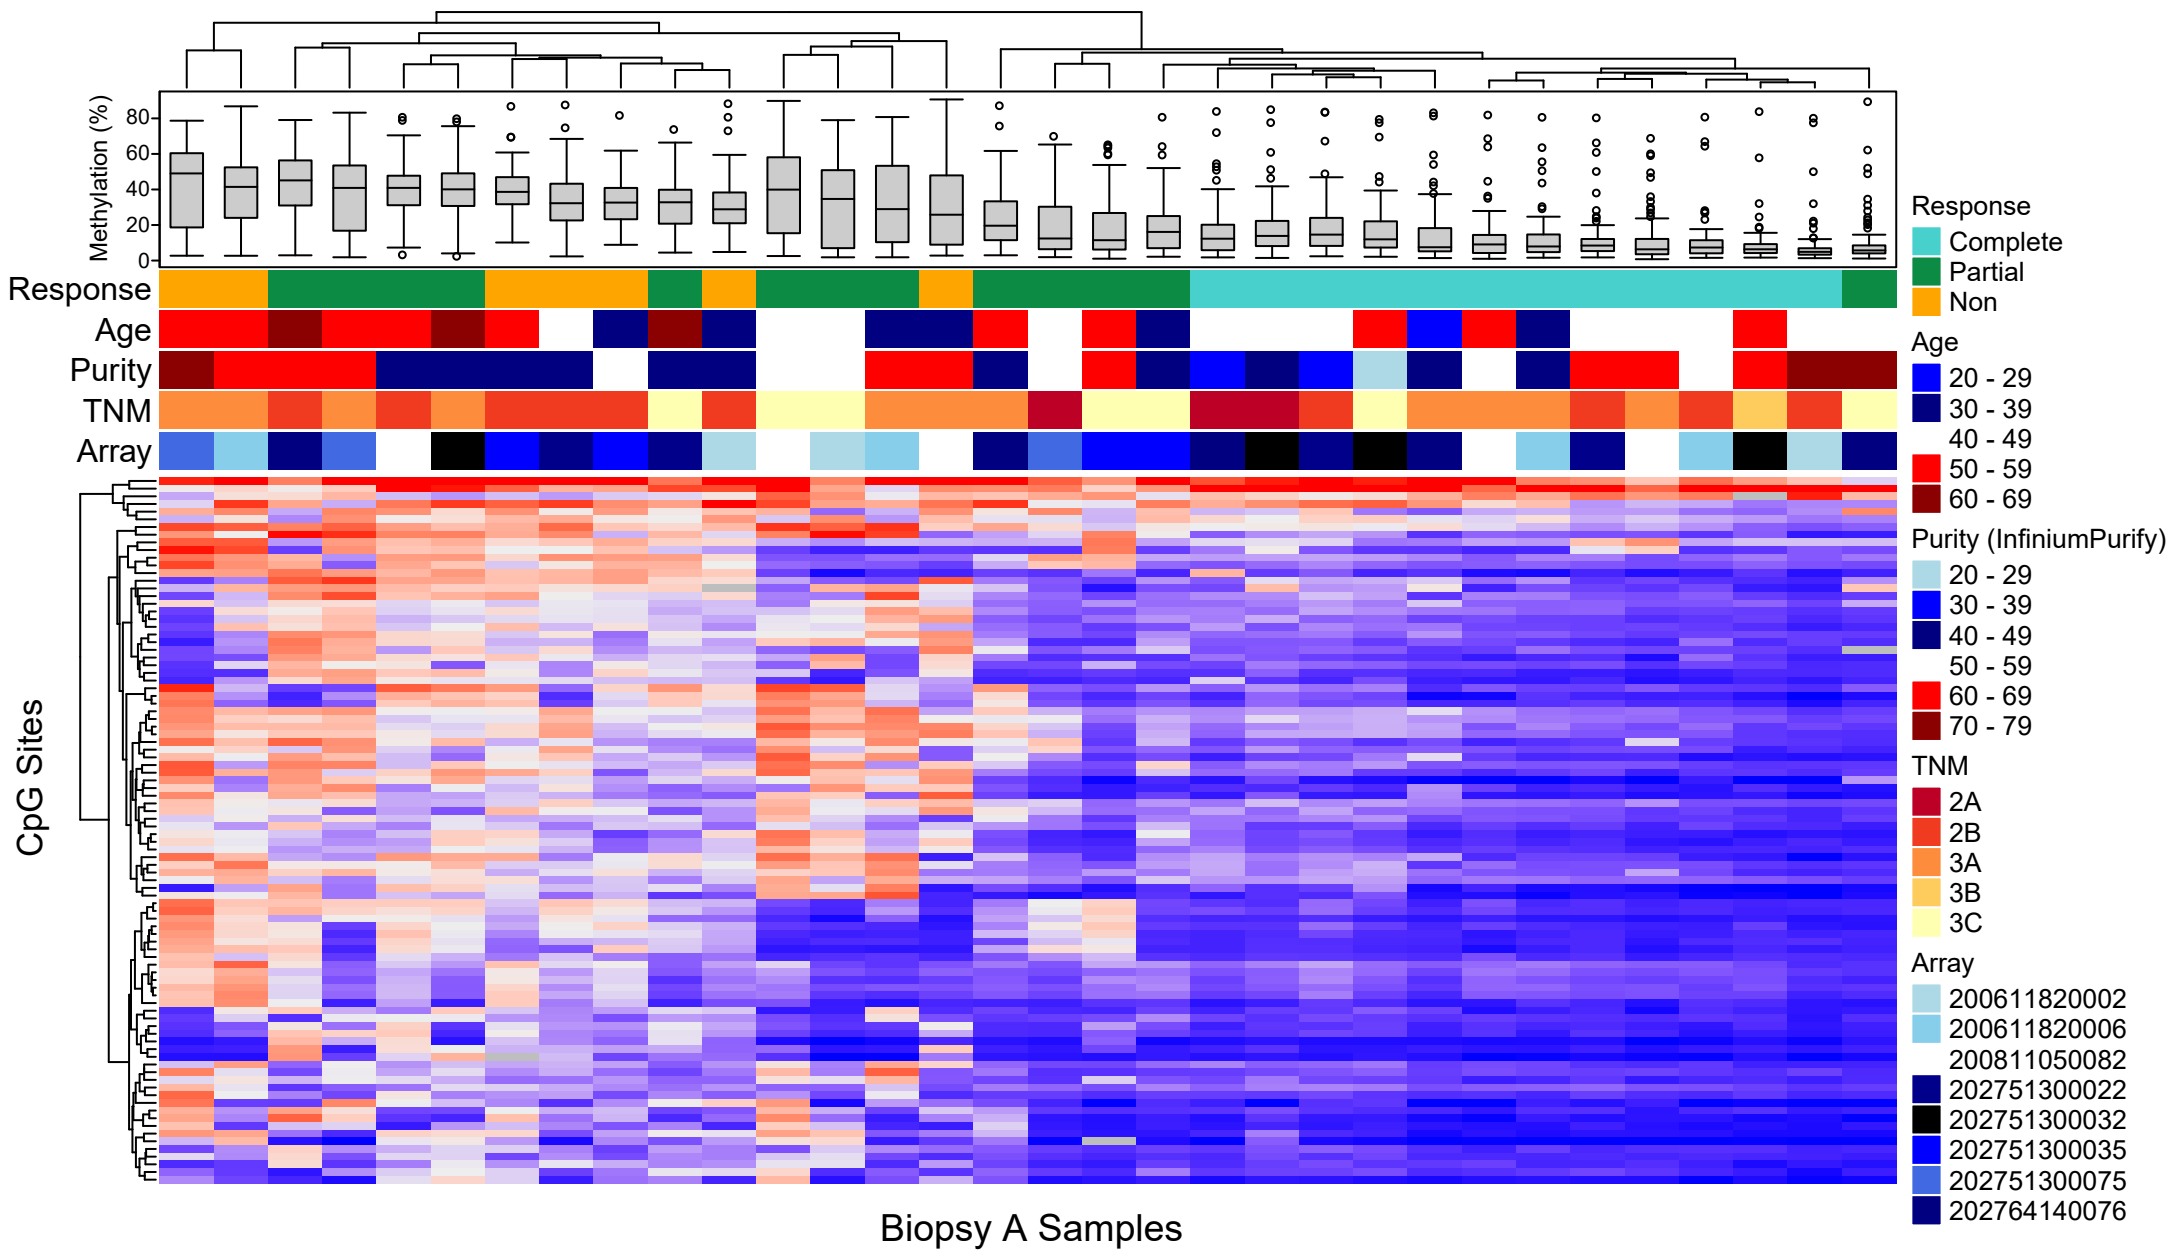

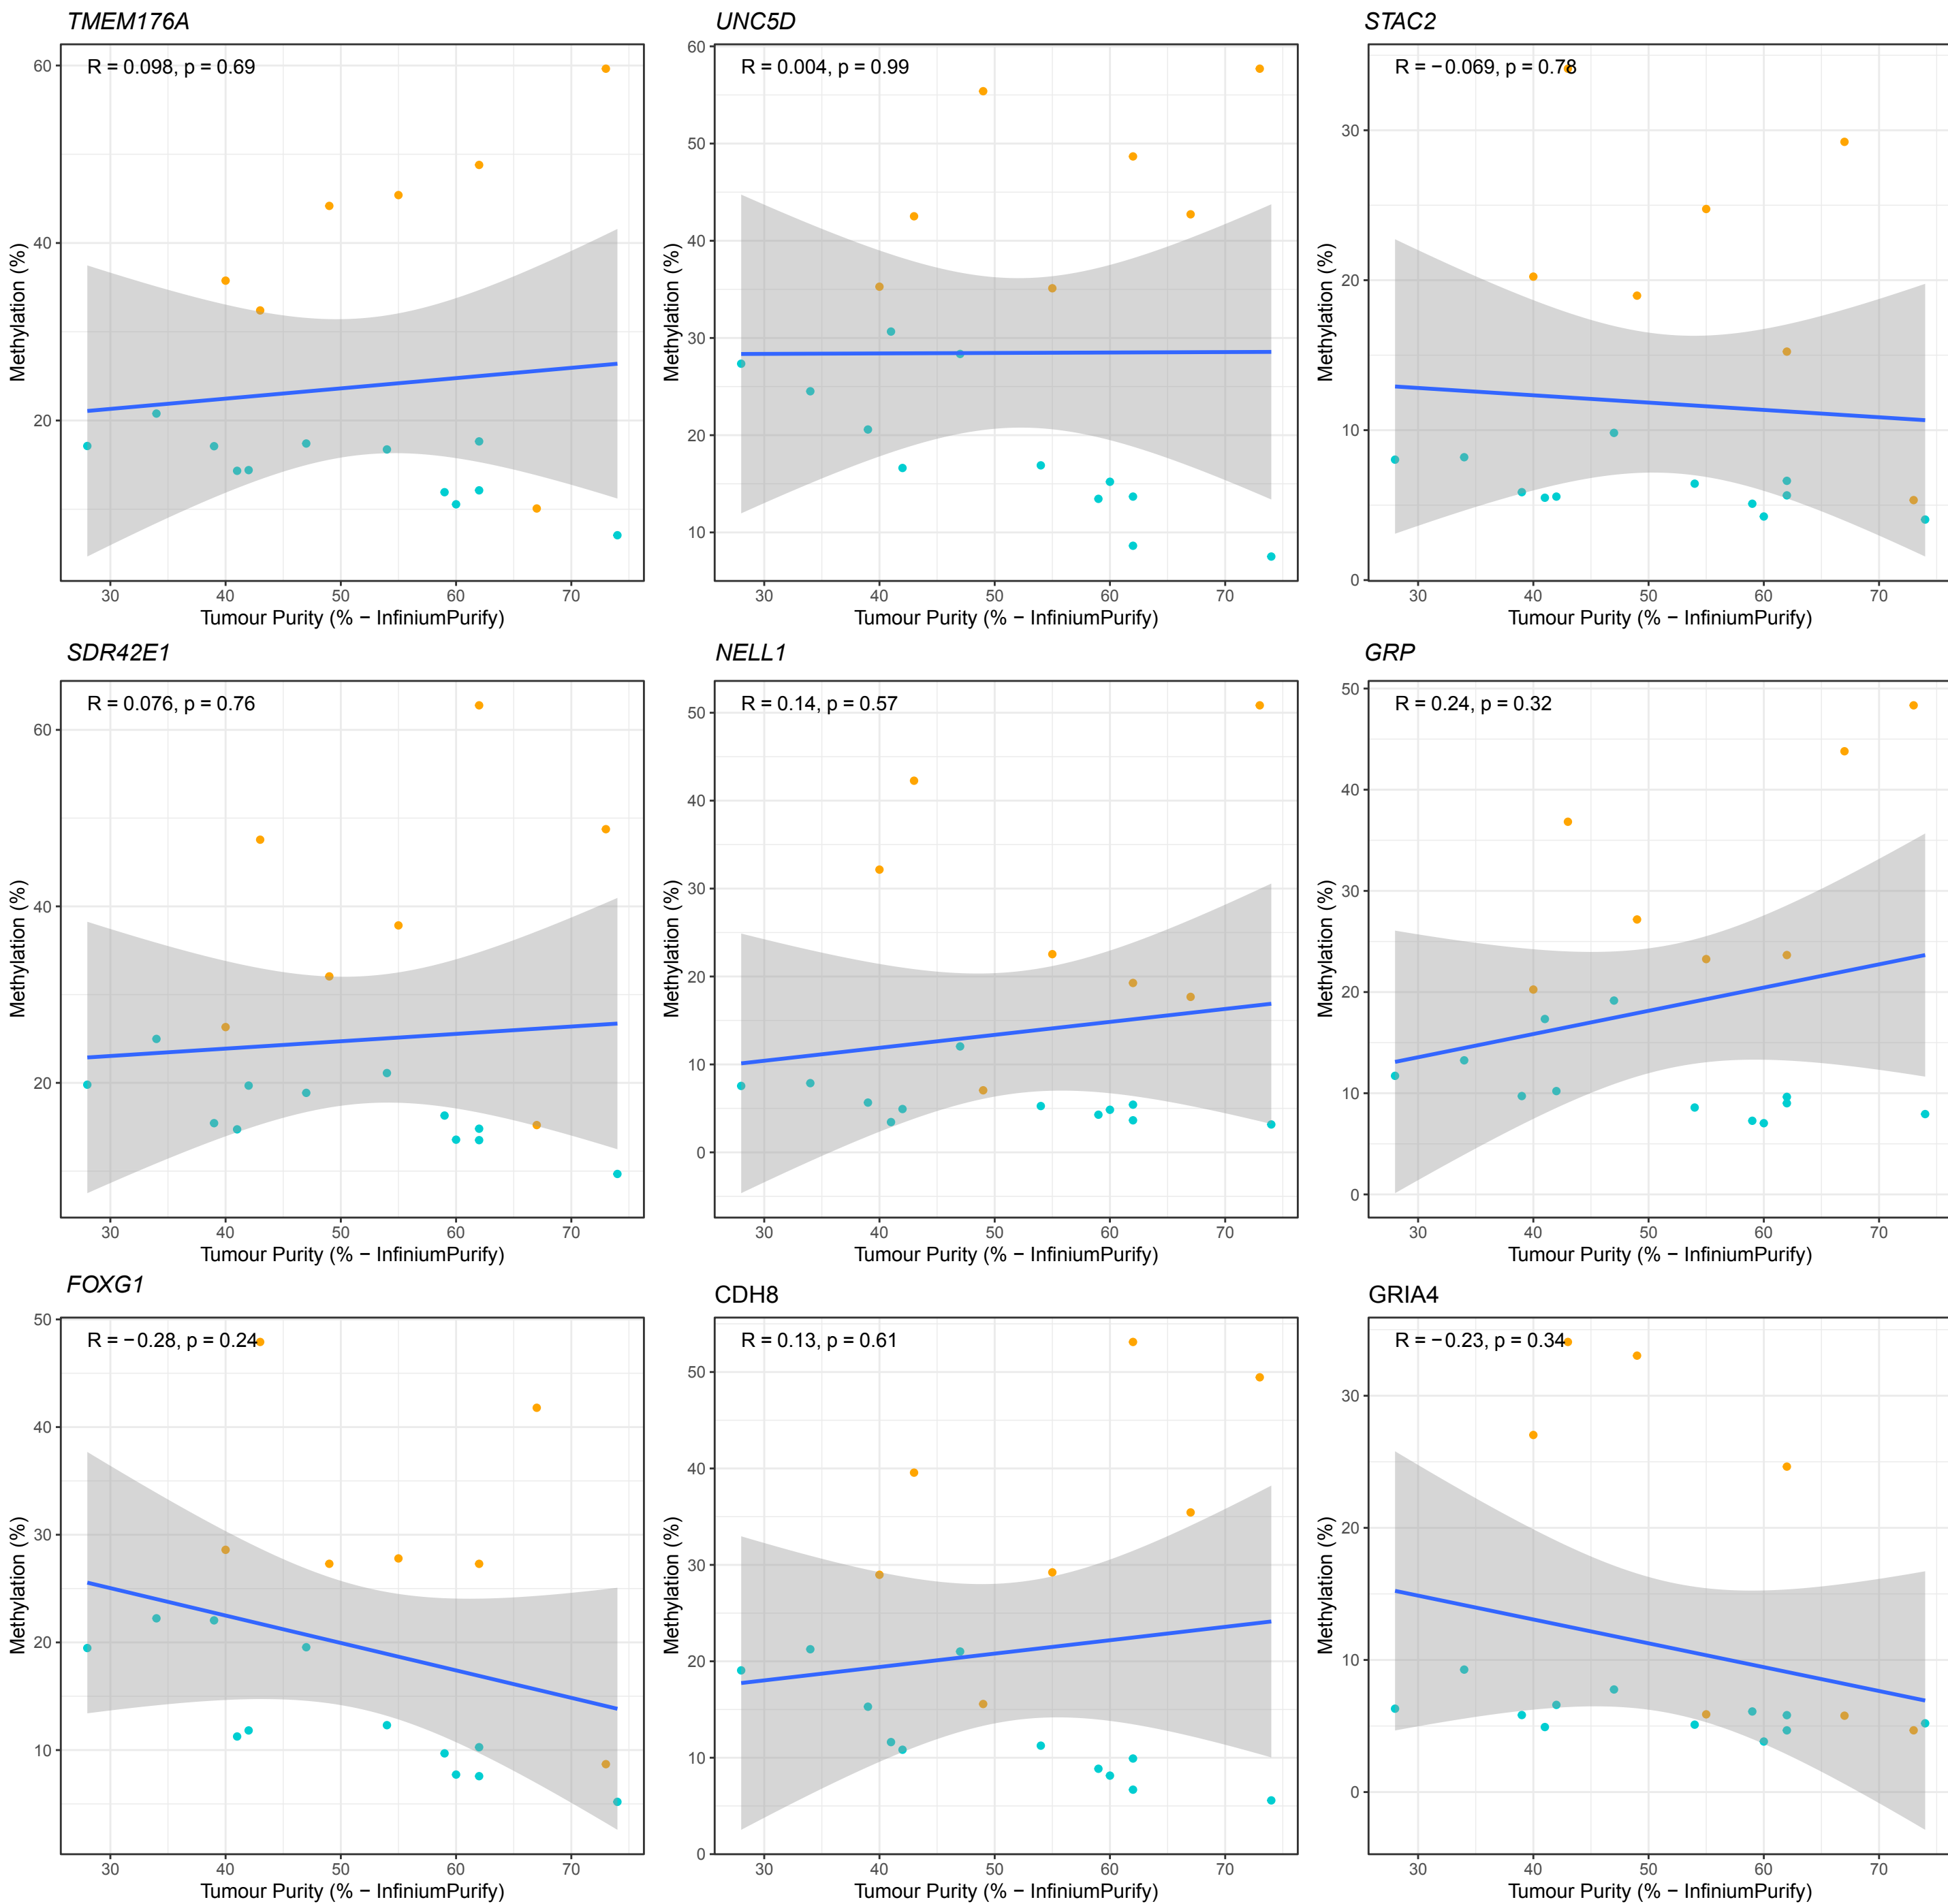

Supplementary Figure 9

Response Complete Non

*TMEM176A/B*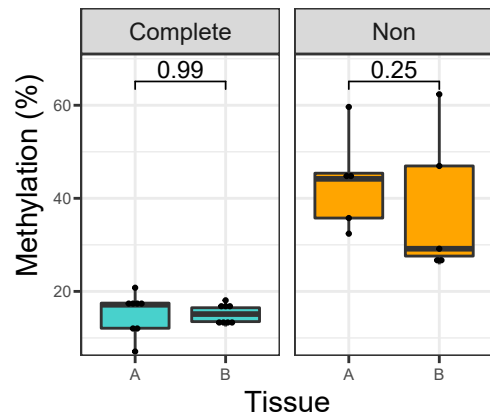*UNC5D*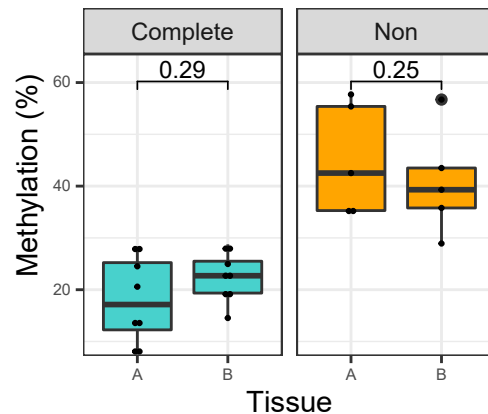*STAC2*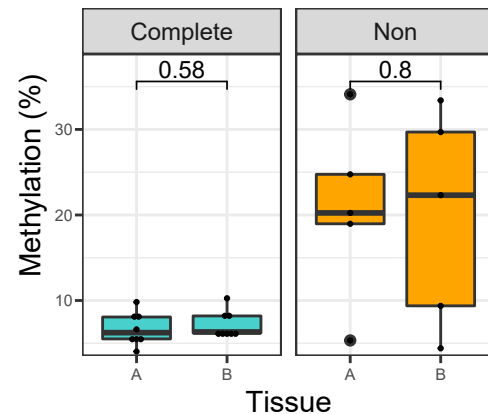*SDR42E1*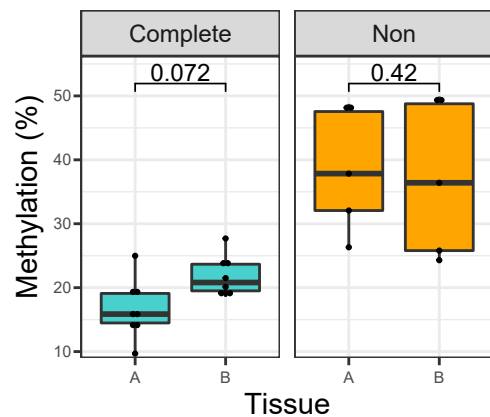*NELL1*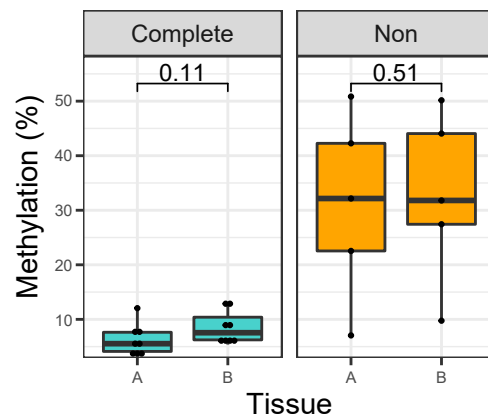*GRP*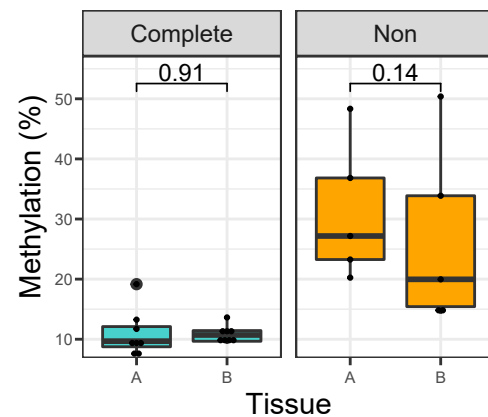*FOXP1*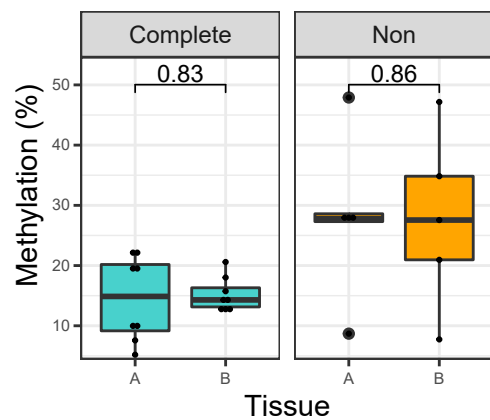*CDH8*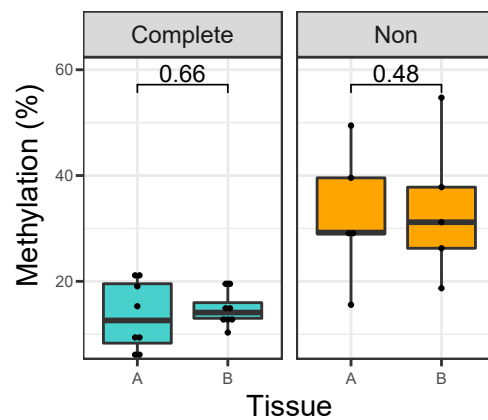*GRIA4*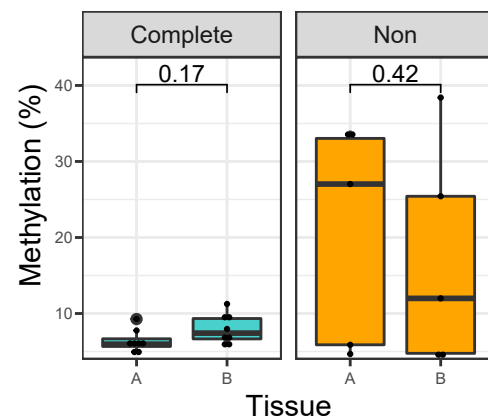

# Supplementary Figure 10

TNBC

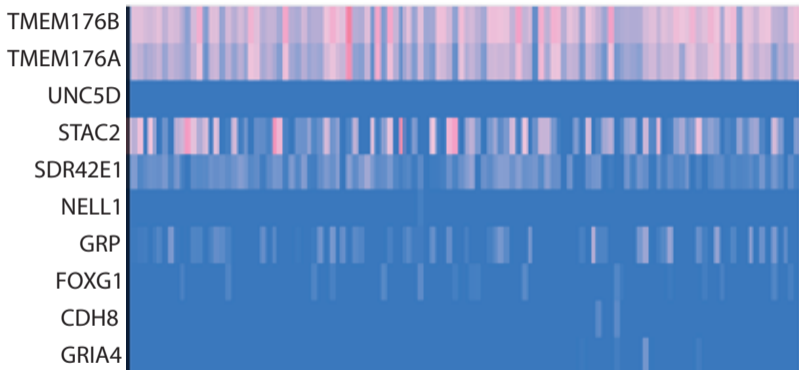

Log2(TPM+1)

0 5 10 15
